# Supplementary material
Source: PubMed Central journal article supplement (PMC7965324)
Supplement: 4055_table.pdf [file 4055_table.pdf]

**On-line Table: Linear regression analysis:  $\beta$ -coefficients (model  $R^2$ ) ( $P$  values) of correlations between deep gray matter structures with significant volumetric differences and cognitive variables and disease characteristics after adjusting for age, sex, years of education, and head size<sup>a</sup>**

| SDGM Structures   | Global Cognition     | Executive Function  | Attention and Working Memory    | Episodic Memory     | Language Abilities              | Visuospatial Abilities | Disease Duration    | UPDRS                            |
|-------------------|----------------------|---------------------|---------------------------------|---------------------|---------------------------------|------------------------|---------------------|----------------------------------|
| Nucleus accumbens | 0.23 (0.23) (0.060)  | 0.23 (0.26) (0.061) | 0.28 (0.32) (0.20) <sup>b</sup> | 0.15 (0.17) (0.257) | 0.25 (0.25) (0.39) <sup>b</sup> | -0.08 (0.12) (.531)    | 0.19 (0.03) (.170)  | -0.22 (0.08) (.111)              |
| Thalamus          | 0.07 (0.20) (.571)   | 0.06 (0.23) (.638)  | 0.23 (0.30) (.066)              | -0.02 (0.16) (.854) | 0.17 (0.27) (.157)              | -0.03 (0.11) (.838)    | 0.25 (0.05) (.073)  | -0.12 (0.05) (.396)              |
| Amygdala          | -0.148 (0.20) (.172) | -0.30 (0.30) (.004) | 0.01 (0.27) (.912)              | -0.11 (0.17) (.341) | -0.14 (0.27) (.180)             | -0.08 (0.12) (.507)    | 0.25 (0.06) (.038)  | -0.01 (0.05) (.953)              |
| Hippocampus       | 0.03 (0.20) (.795)   | 0.05 (0.23) (.690)  | 0.12 (0.28) (.268)              | 0.07 (0.16) (.567)  | 0.11 (0.26) (.317)              | 0.02 (0.11) (.832)     | 0.08 (0.02) (.530)  | -0.17 (0.07) (.173)              |
| Caudate nucleus   | 0.05 (0.20) (.673)   | -0.06 (0.22) (.625) | 0.16 (0.29) (.159)              | -0.11 (0.17) (.382) | -0.12 (0.26) (.287)             | 0.01 (0.11) (.924)     | -0.12 (0.02) (.362) | -0.16 (0.06) (.208)              |
| Putamen           | 0.07 (0.20) (.551)   | 0.03 (0.23) (.821)  | 0.31 (0.34) (.005) <sup>b</sup> | 0.05 (0.16) (.674)  | -0.11 (0.26) (.328)             | 0.14 (0.13) (.250)     | 0.08 (0.02) (.512)  | -0.33 (0.12) (.009) <sup>b</sup> |
| Pallidum          | 0.09 (0.20) (.391)   | 0.03 (0.23) (.752)  | 0.19 (0.30) (.063)              | -0.06 (0.16) (.566) | 0.04 (0.25) (.721)              | 0.08 (0.12) (.456)     | 0.20 (0.05) (.081)  | 0.00 (0.05) (.965)               |

**Note:**—UPDRS indicates Unified Parkinson's Disease Rating Scale.

<sup>a</sup> Cells contain  $\beta$ -coefficients, model  $R^2$ , and  $P$  values, respectively.

<sup>b</sup> Significant linear regression coefficients after adjustment for age, sex, years of education, and head size.
